# Supplementary material for: Intake of Dietary Fruit, Vegetables, and Fiber and Risk of Colorectal Cancer According to Molecular Subtypes: A Pooled Analysis of 9 Studies
Source: Oxford University Press journal article supplement (doi:10.1158/0008-5472.can-20-0168), 2020-08-14
Supplement: 00085472can200168-sup-235725_2_supp_6425980_qdh6rr.xlsx [file 00085472can200168-sup-235725_2_supp_6425980_qdh6rr.xlsx]

## Sheet: Supplementary Table S1
Supplementary Table S1. Descriptive characteristics of each study.
						Age		Sex		Tobacco smoking		Red meat (servings/day)		Processed meat (servings/day)		Total energy (kcal/day)		Fruits (servings/day)		Vegetables (servings/day)		Fiber (g/day)
Study name	Abbreviated study name	Design	Country	No. of cases	No. of controls	Mean (SD)	No. of subjects with missing data (%)	No. of men (%)	No. of subjects with missing data (%)	No. of past or current smoker (%)	No. of subjects with missing data (%)	Mean (SD)	No. of subjects with missing data (%)	Mean (SD)	No. of subjects with missing data (%)	Mean (SD)	No. of subjects with missing data (%)	mean (SD)	No. of subjects with missing data (%)	Mean (SD)	No. of subjects with missing data (%)	Mean (SD)	No. of subjects with missing data (%)
Colon Cancer Family Registry	CCFR	Case-control	U.S., Canada, Australia	4662	2250	54.6 (11.7)	2 (0.03)	3,543 (51.3)	0 (0.0)	3,394 (49.1)	833 (12.1)	0.66 (0.60)	801 (11.6)	0.35 (0.35)	4452 (64.4)	2239.3 (863.2)	4,452 (64.4)	1.5 (1.2)	750 (10.9)	1.8 (1.3)	630 (9.1)	26.0 (11.9)	4,452 (64.4)
Cancer Prevention Study II	CPSII	Cohort	U.S.	860	969	67.7 (5.8)	0 (0.0)	916 (50.1)	0 (0.0)	1,040 (56.9)	2 (0.1)	0.72 (0.56)	54 (3.0)	0.17 (0.20)	54 (3.0)	1704.5 (555.4)	54 (3.0)	1.3 (0.9)	54 (3.0)	3.1 (1.7)	54 (3.0)	17.0 (7.2)	54 (3.0)
Diet, Activity and Lifestyle Study	DALS	Case-control	U.S.	1099	1163	64.1 (9,7)	0 (0.0)	1,243 (55.0)	0 (0.0)	1216 (53.8)	3 (0.1)	1.00 (0.79)	0 (0.0)	0.23 (0.26)	0 (0.0)	2318.9 (956.3)	0 (0.0)	2.2 (1.8)	0 (0.0)	3.4 (2.3)	0 (0.0)	24.6 (10.8)	0 (0.0)
European Prospective Investigation into Cancer_Sweden	EPIC_Sweden	Cohort	Sweden	147	385	54.6 (7.2)	0 (0.0)	291 (54.7)	0 (0.0)	204 (38.3)	99 (18.6)	0.20 (0.15)	0 (0.0)	0.51 (0.39)	0 (0.0)	1787.3 (621.4)	0 (0.0)	1.3 (0.9)	0 (0.0)	1.3 (1.2)	0 (0.0)	20.1 (7.2)	0 (0.0)
Health Professionals Follow-up Study	HPFS	Cohort	U.S.	629	459	68.2 (9.0)	0 (0.0)	1,088 (100.0)	0 (0.0)	598 (55.0)	71 (6.5)	0.95 (0.72)	11 (1.0)	0.21 (0.31)	153 (14.1)	2012.0 (610.0)	209 (19.2)	2.7 (1.7)	42 (3.9)	3.5 (1.9)	42 (3.9)	23.1 (7.1)	147 (13.5)
Melbourne Collaborative Cohort Study	MCCS	Cohort	Australia	490	674	59.5 (7.6)	0 (0.0)	611 (52.5)	0 (0.0)	556 (47.8)	0 (0.0)	1.19 (0.78)	1 (0.09)	0.42 (0.39)	1 (0.09)	2257.7 (758.0)	1 (0.09)	4.1 (2.9)	1 (0.09)	5.3 (2.9)	1 (0.09)	31.2 (11.9)	1 (0.09)
Newfoundland Familial Colorectal Cancer Registries	NFCCR	Case-control	Canada	573	472	59.6 (9.3)	0 (0.0)	627 (60.0)	0 (0.0)	628 (60.1)	110 (10.5)	0.52 (0.50)	76 (7.3)	NA	1,045 (100)	2405.7 (893.5)	107 (10.2)	1.5 (1.2)	133 (12.7)	1.7 (1.2)	86 (8.2)	22.7 (10.9)	107 (10.2)
Nurses’ Health Study	NHS	Cohort	U.S.	793	1082	63.1 (8.6)	6 (0.3)	0 (0.0)	0 (0.0)	1069 (57.0)	21 (1.1)	0.66 (0.52)	137 (7.3)	0.15 (0.22)	231 (12.3)	1726.0 (513.4)	235 (12.5)	2.5 (1.4)	324 (17.3)	3.4 (1.8)	324 (17.3)	19.1 (5.8)	246 (13.1)
Northern Sweden Health and Disease Study	NSHDS	Cohort	Sweden	339	415	59.0 (7.9)	0 (0.0)	277 (36.7)	0 (0.0)	299 (39.7)	236 (31.3)	1.11 (1.02)	629 (83.4)	0.24 (0.33)	629 (83.4)	1693.1 (621.4)	415 (55.0)	1.2 (1.0)	629 (83.4)	0.9 (1.0)	638 (84.6)	19.1 (8.2)	415 (55.0)
Abbreviations: NA: data not available; SD: standard deviation.
