# Supplementary material for: Intake of Dietary Fruit, Vegetables, and Fiber and Risk of Colorectal Cancer According to Molecular Subtypes: A Pooled Analysis of 9 Studies
Source: Oxford University Press journal article supplement (doi:10.1158/0008-5472.can-20-0168), 2020-08-14
Supplement: 00085472can200168-sup-235725_2_supp_6464671_qjbh1j.xlsx [file 00085472can200168-sup-235725_2_supp_6464671_qjbh1j.xlsx]

## Sheet: Supplementary Table S5
Supplementary Table S5. ORs and 95% CIs for the association of fruits, vegetables, and fiber intake with the risk of CRC overall.
	Quartile
	Lowest (Q1)	Second (Q2)	Third (Q3)	Highest (Q4)	Ptrend
Fruits (servings/day)
Cases (n)/Controls (n)	1816/1938	2778/1736	1989/1682	1404/1430
Minimally adjusted OR (95%CI)a	1.00 (Reference)	1.22 (1.11-1.34)	1.03 (0.93-1.14)	0.96 (0.86-1.06)	0.12
Multivariate adjusted OR (95%CI)b	1.00 (Reference)	1.26 (1.14-1.38)	1.08 (0.98-1.20)	1.04 (0.93-1.15)	0.99
Vegetables (servings/day)
Cases (n)/Controls (n)	1762/1772	2930/1987	2205/1828	1190/1238
Minimally adjusted OR (95%CI)a	1.00 (Reference)	1.03 (0.94-1.14)	0.96 (0.87-1.06)	0.89 (0.80-0.99)	0.03
Multivariate adjusted OR (95%CI)b	1.00 (Reference)	1.04 (0.95-1.15)	0.98 (0.89-1.09)	0.92 (0.82-1.03)	0.09
Fiber (g/day)
Cases (n)/Controls (n)	1454/1606	1368/1621	1323/1624	1409/1634
Minimally adjusted OR (95%CI)a	1.00 (Reference)	0.89 (0.80-0.99)	0.81 (0.72-0.90)	0.80 (0.71-0.90)	5.4e-05
Multivariate adjusted OR (95%CI)b	1.00 (Reference)	0.91 (0.82-1.01)	0.84 (0.75-0.94)	0.85 (0.76-0.97)	6.2e-03
a Minimally adjusted OR was adjusted for age, sex, study, and total energy (continuous).
b In addition to minimally adjusted OR, multivariate adjusted OR was further adjusted for tobacco smoking (never-, past and current smoker <25, 25-<50, 50-<75, ≥75 pack-years), red meat intake (study- and sex-specific quartiles as continuous), and processed meat intake (study- and sex-specific quartiles as continuous).
Abbreviations: CI: confidence interval; OR: odds ratio.
