# Supplementary material for: Intake of Dietary Fruit, Vegetables, and Fiber and Risk of Colorectal Cancer According to Molecular Subtypes: A Pooled Analysis of 9 Studies
Source: Oxford University Press journal article supplement (doi:10.1158/0008-5472.can-20-0168), 2020-08-14
Supplement: 00085472can200168-sup-235725_2_supp_6464672_qcbh1c.xlsx [file 00085472can200168-sup-235725_2_supp_6464672_qcbh1c.xlsx]

## Sheet: Supplementary Table S6
Supplementary Table S6. ORs and 95% CIs for the association of fruits, vegetables, and fiber intake with the risk of molecular subtypes of CRC in case-control analysis, stratified by study design.
	Quartile
	Lowest (Q1)	Second (Q2)	Third (Q3)	Highest (Q4)	Ptrend	Pdiffa
Cohort studies
Fruits (servings/day)
MSI-high vs Controls
Cases (n)/Controls (n)	112/950	107/892	99/843	88/753
Minimally adjusted OR (95%CI)b	1.00 (Reference)	0.98 (0.74-1.31)	0.97 (0.72-1.30)	0.89 (0.65-1.22)	0.48
Multivariate adjusted OR (95%CI)c	1.00 (Reference)	1.01 (0.75-1.34)	1.02 (0.75-1.37)	0.94 (0.68-1.30)	0.76
MSS/MSI-low vs Controls
Cases (n)/Controls (n)	608/950	541/892	472/843	477/753
Minimally adjusted OR (95%CI)b	1.00 (Reference)	0.97 (0.83-1.13)	0.93 (0.79-1.09)	1.00 (0.85-1.19)	0.85	0.55
Multivariate adjusted OR (95%CI)c	1.00 (Reference)	0.99 (0.85-1.16)	0.97 (0.82-1.14)	1.07 (0.90-1.27)	0.57	0.55
CIMP-positive vs Controls
Cases (n)/Controls (n)	135/950	129/892	110/843	113/753
Minimally adjusted OR (95%CI)b	1.00 (Reference)	1.04 (0.80-1.35)	0.94 (0.71-1.24)	1.05 (0.79-1.40)	0.94
Multivariate adjusted OR (95%CI)c	1.00 (Reference)	1.05 (0.81-1.37)	0.97 (0.74-1.29)	1.10 (0.82-1.48)	0.67
CIMP-negative vs Controls
Cases (n)/Controls (n)	588/950	528/892	483/843	463/753
Minimally adjusted OR (95%CI)b	1.00 (Reference)	0.97 (0.83-1.14)	0.98 (0.83-1.15)	0.98 (0.82-1.16)	0.78	0.82
Multivariate adjusted OR (95%CI)c	1.00 (Reference)	0.99 (0.85-1.16)	1.02 (0.86-1.20)	1.04 (0.88-1.24)	0.62	0.90
BRAF-mutated vs Controls
Cases (n)/Controls (n)	110/950	99/892	91/843	86/753
Minimally adjusted OR (95%CI)b	1.00 (Reference)	0.96 (0.72-1.29)	0.97 (0.72-1.32)	0.99 (0.72-1.36)	0.93
Multivariate adjusted OR (95%CI)c	1.00 (Reference)	0.98 (0.73-1.31)	1.01 (0.75-1.37)	1.04 (0.75-1.43)	0.81
BRAF-wildtype vs Controls
Cases (n)/Controls (n)	602/950	552/892	477/843	475/753
Minimally adjusted OR (95%CI)b	1.00 (Reference)	0.99 (0.85-1.16)	0.94 (0.80-1.11)	0.99 (0.84-1.17)	0.74	0.93
Multivariate adjusted OR (95%CI)c	1.00 (Reference)	1.02 (0.87-1.19)	0.99 (0.84-1.16)	1.07 (0.90-01.27)	0.60	0.96
KRAS-mutated vs Controls
Cases (n)/Controls (n)	216/950	232/892	203/843	182/753
Minimally adjusted OR (95%CI)b	1.00 (Reference)	1.14 (0.92-1.41)	1.10 (0.88-1.38)	1.02 (0.80-1.29)	0.93
Multivariate adjusted OR (95%CI)c	1.00 (Reference)	1.16 (0.93-1.44)	1.14 (0.91-1.43)	1.07 (0.84-1.36)	0.58
KRAS-wildtype vs Controls
Cases (n)/Controls (n)	457/950	394/892	336/843	361/753
Minimally adjusted OR (95%CI)b	1.00 (Reference)	0.95 (0.80-1.13)	0.89 (0.75-1.06)	1.03 (0.85-1.24)	0.96	0.90
Multivariate adjusted OR (95%CI)c	1.00 (Reference)	0.98 (0.82-1.16)	0.93 (0.78-1.12)	1.11 (0.92-1.34)	0.46	0.97
Vegetables (servings/day)
MSI-high vs Controls
Cases (n)/Controls (n)	126/1076	100/784	88/823	92/747
Minimally adjusted OR (95%CI)b	1.00 (Reference)	0.98 (0.74-1.31)	0.85 (0.63-1.14)	0.95 (0.69-1.29)	0.51
Multivariate adjusted OR (95%CI)c	1.00 (Reference)	1.01 (0.75-1.35)	0.88 (0.65-1.19)	0.956 (0.71-1.32)	0.61
MSS/MSI-low vs Controls
Cases (n)/Controls (n)	620/1076	511/784	558/823	408/747
Minimally adjusted OR (95%CI)b	1.00 (Reference)	1.05 (0.90-1.23)	1.09 (0.93-1.28)	0.86 (0.72-1.02)	0.23	0.99
Multivariate adjusted OR (95%CI)c	1.00 (Reference)	1.06 (0.90-1.24)	1.11 (0.95-1.31)	0.88 (0.74-1.04)	0.35	0.99
CIMP-positive vs Controls
Cases (n)/Controls (n)	153/1076	123/784	104/823	107/747
Minimally adjusted OR (95%CI)b	1.00 (Reference)	1.14 (0.87-1.48)	1.00 (0.75-1.32)	1.11 (0.83-1.49)	0.69
Multivariate adjusted OR (95%CI)c	1.00 (Reference)	1.17 (0.90-1.53)	1.03 (0.78-1.37)	1.13 (0.84-1.52)	0.57
CIMP-negative vs Controls
Cases (n)/Controls (n)	589/1076	506/784	545/823	421/747
Minimally adjusted OR (95%CI)b	1.00 (Reference)	1.05 (0.89-1.23)	1.06 (0.90-1.25)	0.88 (0.74-1.05)	0.27	0.32
Multivariate adjusted OR (95%CI)c	1.00 (Reference)	1.05 (0.89-1.24)	1.08 (0.92-1.27)	0.90 (0.76-1.07)	0.41	0.31
BRAF-mutated vs Controls
Cases (n)/Controls (n)	118/1076	105/784	86/823	77/747
Minimally adjusted OR (95%CI)b	1.00 (Reference)	1.19 (0.89-1.59)	0.97 (0.71-1.32)	0.95 (0.68-1.32)	0.55
Multivariate adjusted OR (95%CI)c	1.00 (Reference)	1.22 (0.91-1.63)	1.00 (0.74-1.37)	0.96 (0.69-1.34)	0.63
BRAF-wildtype vs Controls
Cases (n)/Controls (n)	626/1076	503/784	555/823	422/747
Minimally adjusted OR (95%CI)b	1.00 (Reference)	0.99 (0.84-1.16)	1.04 (0.89-1.22)	0.86 (0.72-1.02)	0.19	0.93
Multivariate adjusted OR (95%CI)c	1.00 (Reference)	0.99 (0.85-1.17)	1.06 (0.90-1.24)	0.88 (0.74-1.04)	0.31	0.96
KRAS-mutated vs Controls
Cases (n)/Controls (n)	226/1076	223/784	227/823	157/747
Minimally adjusted OR (95%CI)b	1.00 (Reference)	1.19 (0.96-1.48)	1.15 (0.92-1.43)	0.86 (0.68-1.10)	0.32
Multivariate adjusted OR (95%CI)c	1.00 (Reference)	1.21 (0.97-1.50)	1.17 (0.94-1.45)	0.88 (0.69-1.12)	0.42
KRAS-wildtype vs Controls
Cases (n)/Controls (n)	490/1076	352/784	380/823	325/747
Minimally adjusted OR (95%CI)b	1.00 (Reference)	0.94 (0.79-1.12)	0.97 (0.81-1.15)	0.90 (0.75-1.09)	0.34	0.83
Multivariate adjusted OR (95%CI)c	1.00 (Reference)	0.95 (0.80-1.13)	0.99 (0.83-1.18)	0.93 (0.77-1.12)	0.52	0.79
Fiber (g/day)
MSI-high vs Controls
Cases (n)/Controls (n)	109/898	90/892	105/874	118/894
Minimally adjusted OR (95%CI)b	1.00 (Reference)	0.81 (0.60-1.09)	0.88 (0.65-1.19)	0.93 (0.69-1.26)	0.82
Multivariate adjusted OR (95%CI)c	1.00 (Reference)	0.83 (0.62-1.13)	0.95 (0.70-1.28)	1.03 (0.76-1.41)	0.65
MSS/MSI-low vs Controls
Cases (n)/Controls (n)	603/898	534/892	506/874	491/894
Minimally adjusted OR (95%CI)b	1.00 (Reference)	0.91 (0.77-1.06)	0.84 (0.71-0.99)	0.78 (0.66-0.93)	3.0e-03	0.17
Multivariate adjusted OR (95%CI)c	1.00 (Reference)	0.92 (0.79-1.08)	0.88 (0.74-1.03)	0.85 (0.71-1.01)	0.048	0.13
CIMP-positive vs Controls
Cases (n)/Controls (n)	127/898	121/892	134/874	146/894
Minimally adjusted OR (95%CI)b	1.00 (Reference)	1.00 (0.76-1.32)	1.08 (0.82-1.42)	1.14 (0.86-1.52)	0.30
Multivariate adjusted OR (95%CI)c	1.00 (Reference)	1.03 (0.78-1.36)	1.14 (0.86-1.50)	1.22 (0.92-1.64)	0.14
CIMP-negative vs Controls
Cases (n)/Controls (n)	584/898	515/892	492/874	477/894
Minimally adjusted OR (95%CI)b	1.00 (Reference)	0.88 (0.75-1.04)	0.82 (0.70-0.97)	0.76 (0.64-0.90)	1.1e-03	3.9e-03
Multivariate adjusted OR (95%CI)c	1.00 (Reference)	0.90 (0.77-1.06)	0.86 (0.72-1.01)	0.82 (0.69-0.98)	0.02	5.6e-03
BRAF-mutated vs Controls
Cases (n)/Controls (n)	106/898	99/892	100/874	104/894
Minimally adjusted OR (95%CI)b	1.00 (Reference)	0.97 (0.72-1.30)	0.94 (0.70-1.28)	0.94 (0.69-1.29)	0.68
Multivariate adjusted OR (95%CI)c	1.00 (Reference)	0.99 (0.74-1.34)	1.00 (0.74-1.36)	1.01 (0.73-1.39)	0.97
BRAF-wildtype vs Controls
Cases (n)/Controls (n)	613/898	521/892	512/874	497/894
Minimally adjusted OR (95%CI)b	1.00 (Reference)	0.86 (0.73-1.01)	0.82 (0.70-0.97)	0.76 (0.64-0.90)	1.5e-03	0.20
Multivariate adjusted OR (95%CI)c	1.00 (Reference)	0.88 (0.75-1.03)	0.87 (0.74-1.02)	0.83 (0.70-0.99)	0.04	0.26
KRAS-mutated vs Controls
Cases (n)/Controls (n)	225/898	203/892	198/874	209/894
Minimally adjusted OR (95%CI)b	1.00 (Reference)	0.90 (0.72-1.12)	0.85 (0.68-1.06)	0.87 (0.70-1.10)	0.21
Multivariate adjusted OR (95%CI)c	1.00 (Reference)	0.91 (0.73-1.14)	0.88 (0.70-1.10)	0.92 (0.73-1.16)	0.44
KRAS-wildtype vs Controls
Cases (n)/Controls (n)	464/898	387/892	373/874	384/894
Minimally adjusted OR (95%CI)b	1.00 (Reference)	0.85 (0.72-1.01)	0.80 (0.67-0.95)	0.79 (0.66-0.94)	7.5e-03	0.41
Multivariate adjusted OR (95%CI)c	1.00 (Reference)	0.87 (0.73-1.04)	0.84 (0.71-1.01)	0.87 (0.72-1.04)	0.12	0.66
Case-control studies
Fruits (servings/day)
MSI-high vs Controls
Cases (n)/Controls (n)	163/988	297/844	198/839	111/677
Minimally adjusted OR (95%CI)b	1.00 (Reference)	1.59 (1.26-2.01)	1.10 (0.86-1.39)	0.84 (0.64-1.10)	0.08
Multivariate adjusted OR (95%CI)c	1.00 (Reference)	1.67 (1.32-2.11)	1.21 (0.95-1.54)	0.96 (0.73-1.26)	0.50
MSS/MSI-low vs Controls
Cases (n)/Controls (n)	839/988	1658/844	1084/839	651/677
Minimally adjusted OR (95%CI)b	1.00 (Reference)	1.49 (1.30-1.71)	1.14 (0.99-1.30)	0.99 (0.86-1.16)	0.47	0.17
Multivariate adjusted OR (95%CI)c	1.00 (Reference)	1.54 (1.34-1.77)	1.19 (1.04-1.37)	1.09 (0.93-1.27)	0.69	0.36
CIMP-positive vs Controls
Cases (n)/Controls (n)	107/988	231/844	158/839	92/677
Minimally adjusted OR (95%CI)b	1.00 (Reference)	1.38 (1.04-1.82)	0.98 (0.74-1.30)	0.79 (0.58-1.08)	0.046
Multivariate adjusted OR (95%CI)c	1.00 (Reference)	1.44 (1.08-1.91)	1.10 (0.83-1.47)	0.94 (0.68-1.30)	0.46
CIMP-negative vs Controls
Cases (n)/Controls (n)	536/988	1128/844	767/839	470/677
Minimally adjusted OR (95%CI)b	1.00 (Reference)	1.64 (1.39-1.94)	1.20 (1.02-1.41)	0.94 (0.78-1.12)	0.14	0.26
Multivariate adjusted OR (95%CI)c	1.00 (Reference)	1.70 (1.44-2.01)	1.27 (1.08-1.50)	1.03 (0.86-1.23)	0.67	0.63
BRAF-mutated vs Controls
Cases (n)/Controls (n)	123/988	222/844	144/839	59/677
Minimally adjusted OR (95%CI)b	1.00 (Reference)	1.26 (0.95-1.66)	0.84 (0.63-1.10)	0.57 (0.41-0.80)	2.5e-04
Multivariate adjusted OR (95%CI)c	1.00 (Reference)	1.33 (1.01-1.76)	0.94 (0.71-1.25)	0.68 (0.48-0.96)	0.02
BRAF-wildtype vs Controls
Cases (n)/Controls (n)	805/988	1746/844	1100/839	642/677
Minimally adjusted OR (95%CI)b	1.00 (Reference)	1.59 (1.38-1.83)	1.18 (1.02-1.36)	1.05 (0.90-1.23)	0.83	3.3e-04
Multivariate adjusted OR (95%CI)c	1.00 (Reference)	1.64 (1.43-1.89)	1.24 (1.08-1.43)	1.15 (0.98-1.34)	0.39	4.2e-03
KRAS-mutated vs Controls
Cases (n)/Controls (n)	222/988	523/844	345/839	187/677
Minimally adjusted OR (95%CI)b	1.00 (Reference)	1.74 (1.41-2.13)	1.27 (1.03-1.56)	1.11 (0.88-1.39)	0.82
Multivariate adjusted OR (95%CI)c	1.00 (Reference)	1.80 (1.46-2.21)	1.34 (1.09-1.64)	1.21 (0.96-1.53)	0.31
KRAS-wildtype vs Controls
Cases (n)/Controls (n)	426/988	1183/844	734/839	377/677
Minimally adjusted OR (95%CI)b	1.00 (Reference)	1.84 (1.56-2.18)	1.31 (1.11-1.54)	1.13 (0.94-1.36)	0.78	0.99
Multivariate adjusted OR (95%CI)c	1.00 (Reference)	1.92 (1.62-2.27)	1.40 (1.19-1.66)	1.27 (1.06-1.53)	0.12	0.81
Vegetables (servings/day)
MSI-high vs Controls
Cases (n)/Controls (n)	129/696	341/1203	231/1005	86/491
Minimally adjusted OR (95%CI)b	1.00 (Reference)	1.17 (0.92-1.48)	1.09 (0.85-1.40)	0.85 (0.62-1.15)	0.33
Multivariate adjusted OR (95%CI)c	1.00 (Reference)	1.18 (0.93-1.49)	1.14 (0.89-1.47)	0.88 (0.64-1.20)	0.55
MSS/MSI-low vs Controls
Cases (n)/Controls (n)	777/696	1790/1203	1221/1005	521/491
Minimally adjusted OR (95%CI)b	1.00 (Reference)	0.99 (0.87-1.15)	0.91 (0.79-1.06)	0.94 (0.79-1.12)	0.22	0.79
Multivariate adjusted OR (95%CI)c	1.00 (Reference)	1.00 (0.87-1.15)	0.93 (0.80-1.08)	0.96 (0.81-1.14)	0.35	0.96
CIMP-positive vs Controls
Cases (n)/Controls (n)	108/696	257/1203	142/1005	84/491
Minimally adjusted OR (95%CI)b	1.00 (Reference)	1.12 (0.86-1.47)	0.98 (0.74-1.31)	0.99 (0.71-1.38)	0.69
Multivariate adjusted OR (95%CI)c	1.00 (Reference)	1.13 (0.86-1.48)	1.04 (0.78-1.39)	1.04 (0.74-1.45)	0.99
CIMP-negative vs Controls
Cases (n)/Controls (n)	471/696	1205/1203	906/1005	363/491
Minimally adjusted OR (95%CI)b	1.00 (Reference)	1.02 (0.86-1.21)	0.92 (0.77-1.10)	0.95 (0.77-1.17)	0.30	0.81
Multivariate adjusted OR (95%CI)c	1.00 (Reference)	1.03 (0.87-1.22)	0.93 (0.78-1.12)	0.96 (0.78-1.19)	0.40	0.61
BRAF-mutated vs Controls
Cases (n)/Controls (n)	89/696	265/1203	142/1005	58/491
Minimally adjusted OR (95%CI)b	1.00 (Reference)	1.14 (0.87-1.50)	0.99 (0.74-1.34)	0.88 (0.61-1.28)	0.37
Multivariate adjusted OR (95%CI)c	1.00 (Reference)	1.15 (0.88-1.52)	1.06 (0.78-1.43)	0.91 (0.63-1.32)	0.59
BRAF-wildtype vs Controls
Cases (n)/Controls (n)	782/696	1871/1203	1238/1005	492/491
Minimally adjusted OR (95%CI)b	1.00 (Reference)	1.02 (0.88-1.17)	0.89 (0.77-1.04)	0.90 (0.76-1.08)	0.07	0.99
Multivariate adjusted OR (95%CI)c	1.00 (Reference)	1.02 (0.89-1.18)	0.91 (0.78-1.06)	0.92 (0.77-1.10)	0.12	0.80
KRAS-mutated vs Controls
Cases (n)/Controls (n)	222/696	589/1203	334/1005	158/491
Minimally adjusted OR (95%CI)b	1.00 (Reference)	1.04 (0.86-1.27)	0.93 (0.75-1.15)	1.10 (0.85-1.42)	0.99
Multivariate adjusted OR (95%CI)c	1.00 (Reference)	1.05 (0.86-1.28)	0.95 (0.76-1.18)	1.12 (0.87-1.45)	0.82
KRAS-wildtype vs Controls
Cases (n)/Controls (n)	478/696	1264/1203	724/1005	286/491
Minimally adjusted OR (95%CI)b	1.00 (Reference)	1.04 (0.89-1.23)	0.98 (0.83-1.17)	0.92 (0.75-1.13)	0.37	0.47
Multivariate adjusted OR (95%CI)c	1.00 (Reference)	1.05 (0.89-1.24)	1.01 (0.85-1.20)	0.94 (0.77-1.16)	0.57	0.49
Fiber (g/day)
MSI-high vs Controls
Cases (n)/Controls (n)	105/708	110/729	79/750	112/740
Minimally adjusted OR (95%CI)b	1.00 (Reference)	0.89 (0.66-1.20)	0.54 (0.38-0.76)	0.65 (0.45-0.94)	3.6e-03
Multivariate adjusted OR (95%CI)c	1.00 (Reference)	0.92 (0.68-1.25)	0.58 (0.41-0.82)	0.74 (0.50-1.07)	0.03
MSS/MSI-low vs Controls
Cases (n)/Controls (n)	558/708	545/729	544/750	601/740
Minimally adjusted OR (95%CI)b	1.00 (Reference)	0.85 (0.72-0.99)	0.73 (0.62-0.87)	0.70 (0.57-0.85)	1.6e-04	0.37
Multivariate adjusted OR (95%CI)c	1.00 (Reference)	0.86 (0.73-1.01)	0.76 (0.64-0.91)	0.76 (0.62-0.93)	3.9e-03	0.50
CIMP-positive vs Controls
Cases (n)/Controls (n)	85/708	105/729	75/750	87/740
Minimally adjusted OR (95%CI)b	1.00 (Reference)	1.17 (0.85-1.62)	0.68 (0.47-0.99)	0.70 (0.46-1.06)	0.01
Multivariate adjusted OR (95%CI)c	1.00 (Reference)	1.22 (0.88-1.69)	0.76 (0.52-1.10)	0.84 (0.55-1.28)	0.13
CIMP-negative vs Controls
Cases (n)/Controls (n)	315/708	321/729	294/750	363/740
Minimally adjusted OR (95%CI)b	1.00 (Reference)	0.91 (0.75-1.11)	0.71 (0.58-0.89)	0.76 (0.60-0.97)	7.4e-03	0.41
Multivariate adjusted OR (95%CI)c	1.00 (Reference)	0.93 (0.76-1.13)	0.75 (0.60-0.93)	0.84 (0.65-1.07)	0.06	0.71
BRAF-mutated vs Controls
Cases (n)/Controls (n)	72/708	71/729	67/750	77/740
Minimally adjusted OR (95%CI)b	1.00 (Reference)	0.74 (0.52-1.06)	0.54 (0.36-0.80)	0.49 (0.31-0.76)	6.3e-04
Multivariate adjusted OR (95%CI)c	1.00 (Reference)	0.78 (0.55-1.12)	0.61 (0.41-0.91)	0.61 (0.39-0.96)	0.02
BRAF-wildtype vs Controls
Cases (n)/Controls (n)	526/708	517/729	500/750	562/740
Minimally adjusted OR (95%CI)b	1.00 (Reference)	0.86 (0.73-1.02)	0.73 (0.61-0.87)	0.72 (0.59-0.88)	4.3e-04	0.08
Multivariate adjusted OR (95%CI)c	1.00 (Reference)	0.87 (0.74-1.03)	0.76 (0.63-0.91)	0.77 (0.63-0.95)	6.6e-03	0.28
KRAS-mutated vs Controls
Cases (n)/Controls (n)	178/708	167/729	174/750	182/740
Minimally adjusted OR (95%CI)b	1.00 (Reference)	0.86 (0.67-1.10)	0.77 (0.59-1.00)	0.71 (0.52-0.96)	0.02
Multivariate adjusted OR (95%CI)c	1.00 (Reference)	0.87 (0.68-1.11)	0.81 (0.62-1.05)	0.78 (0.57-1.06)	0.10
KRAS-wildtype vs Controls
Cases (n)/Controls (n)	327/708	346/729	301/750	355/740
Minimally adjusted OR (95%CI)b	1.00 (Reference)	0.96 (0.79-1.17)	0.72 (0.58-0.89)	0.74 (0.58-0.94)	2.1e-03	0.89
Multivariate adjusted OR (95%CI)c	1.00 (Reference)	0.99 (0.81-1.20)	0.76 (0.61-0.95)	0.83 (0.65-1.07)	0.04	0.97
a Pdiff test the difference of the dietary risk factor and colorectal cancer association for the two cancer subtypes, such as MSI-high vs MSS/MSI-low. This is based on the case-only analysis testing the difference in the trend across the 4 quartiles.
b Minimally adjusted OR was adjusted for age, sex, study, and total energy (continuous).
c In addition to minimally adjusted OR, multivariate adjusted OR was further adjusted for tobacco smoking (never-, past and current smoker <25, 25-<50, 50-<75, ≥75 pack-years), red meat intake (study- and sex-specific quartiles as continuous), and processed meat intake (study- and sex-specific quartiles as continuous).
Abbreviations: CI: confidence interval; OR: odds ratio.
